# Supplementary material for: Voltammetric studies on the inter-relationship between the redox chemistry of TTF, TTF+˙, TTF2+ and HTTF+ in acidic media
Source: Royal Society of Chemistry journal article supplement (doi:10.1039/c4ra16588h), 2015-01-01
Supplement: c4ra16588h1.pdf [file c4ra16588h1.pdf]

## Supporting Information

### **Voltammetric studies on the inter-relationship of the redox chemistry of TTF, TTF<sup>•+</sup>, TTF<sup>2+</sup> and HTTF<sup>+</sup> in acidic media**

Shaimaa Adeel,<sup>a</sup> Muhammad E. Abdelhamid,<sup>b</sup> Ayman Nafady,<sup>a,c</sup> Qi Li, Lisandra Martin<sup>a\*</sup> and Alan Bond<sup>a\*</sup>

<sup>a</sup> School of Chemistry, Monash University, Clayton, Victoria 3800, Australia.

<sup>b</sup> School of Applied Sciences, RMIT University, GPO Box 2476V, Melbourne, 3001, Australia.

<sup>c</sup> Current address: King Saud University, College of Science, Department of Chemistry, PO Box 2455, Riyadh 11451, Saudi Arabia.

\* To whom correspondence should be addressed, Email: [Lisa.Martin@monash.edu](mailto:Lisa.Martin@monash.edu),  
[Alan.Bond@monash.edu](mailto:Alan.Bond@monash.edu)

**Table S1** Diffusion coefficients (*D*) of TTF, TTF<sup>•+</sup>, TTF<sup>2+</sup> in acetonitrile (0.1 M Bu<sub>4</sub>NPF<sub>6</sub>).

| Technique                  | Equation used for determination of <i>D</i> <sup>a</sup>       | $D_{TTF} \times 10^5$<br>cm <sup>2</sup> s <sup>-1</sup> | $D_{TTF^{•+}} \times 10^5$<br>cm <sup>2</sup> s <sup>-1</sup> | $D_{TTF^{2+}} \times 10^5$<br>cm <sup>2</sup> s <sup>-1</sup> |
|----------------------------|----------------------------------------------------------------|----------------------------------------------------------|---------------------------------------------------------------|---------------------------------------------------------------|
| Linear sweep voltammetry   | $I_p = 0.4463 n F A C \left( \frac{n F v D}{RT} \right)^{0.5}$ | 2.20                                                     | 1.95                                                          | 1.65                                                          |
| RDE voltammetry            | $I_{lim} = 0.620 n F A D^{2/3} \omega^{1/2} \nu^{-1/6} C$      | 2.10                                                     | 1.90                                                          | 1.60                                                          |
| Microelectrode voltammetry | $I_{lim} = 4n F r_e D C$                                       | 2.10                                                     | 1.90                                                          | 1.60                                                          |

<sup>a</sup>  $I_p$  = oxidation peak potential,  $I_{lim}$  = limiting current,  $\nu$  = scan rate

$\omega$  = angular rotation rate,  $\nu$  = kinematic viscosity ( $4.54 \times 10^{-3}$  cm<sup>2</sup> s<sup>-1</sup>),<sup>22</sup>  $r_e$  = electrode radius,  $C$  = concentration,  $n$  = number of electrons transferred (1.0). Other symbols have their usual meaning or are defined in the text.

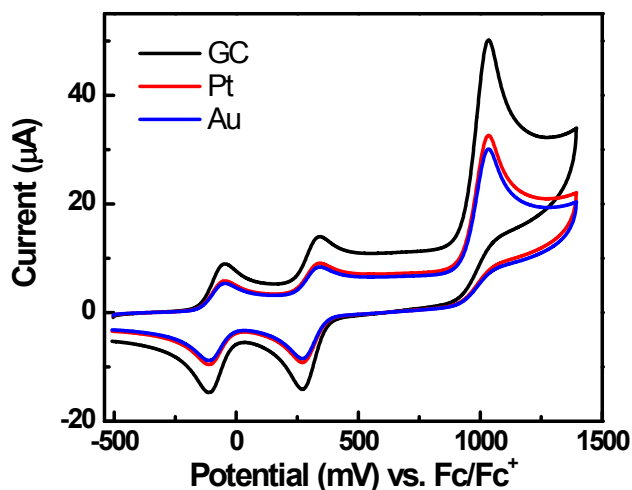

**Figure S1** Cyclic voltammograms obtained for 1.0 mM TTF in CH<sub>3</sub>CN (0.1 M Bu<sub>4</sub>NPF<sub>6</sub>) in the presence of 10 mM ethereal HBF<sub>4</sub> (0.1 M Bu<sub>4</sub>NPF<sub>6</sub>) at GC, Au and Pt electrodes with a scan rate of 100 mV s<sup>-1</sup>.

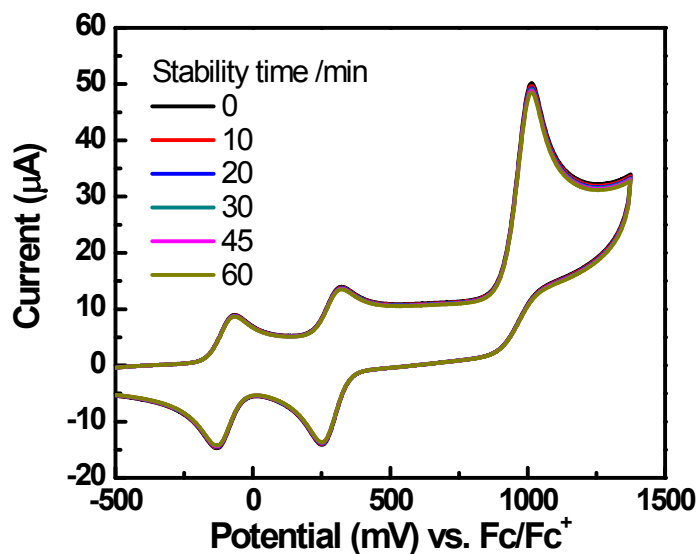

**Figure S2** Cyclic voltammograms obtained as a function of time for 1.0 mM TTF in CH<sub>3</sub>CN (0.1 M Bu<sub>4</sub>NPF<sub>6</sub>) at a 3 mm diameter GC electrode (scan rate of 100 mV s<sup>-1</sup>) in the presence of 10 mM ethereal HBF<sub>4</sub>.

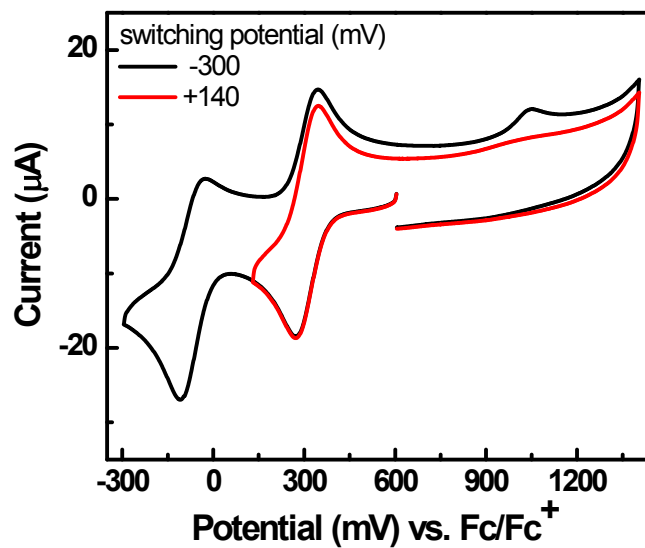

**Figure S3** Cyclic voltammograms obtained at scan rate 100 mV s<sup>-1</sup> in acetonitrile (0.1 M Bu<sub>4</sub>NPF<sub>6</sub>) for 1 mM TTF<sup>2+</sup> in the presence of 66 mM etheral HBF<sub>4</sub> with a 3 mm GC electrode at designated switching potential values.

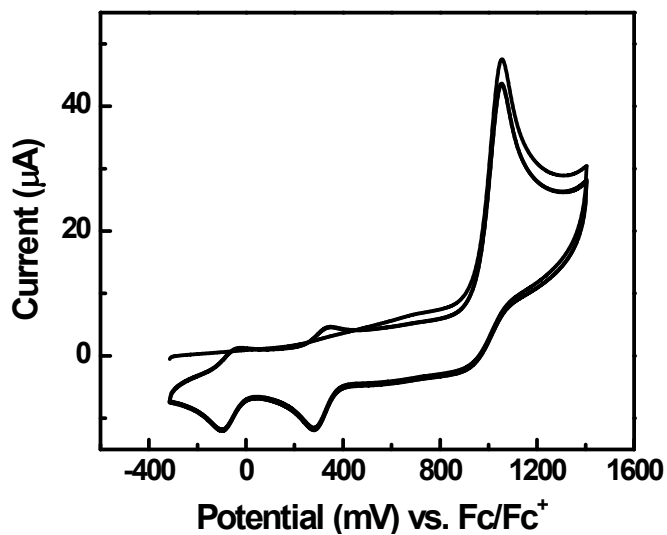

**Figure S4** A cyclic voltammogram (2 cycles of potential) for HTTF<sup>+</sup> obtained after back reduction electrolysis of 0.91 mM TTF<sup>2+</sup> in acetonitrile (0.1 M Bu<sub>4</sub>NPF<sub>6</sub>) in the presence of 66 mM etheral HBF<sub>4</sub> with a 3 mm GC electrode at a scan rate of 100 mV s<sup>-1</sup>.

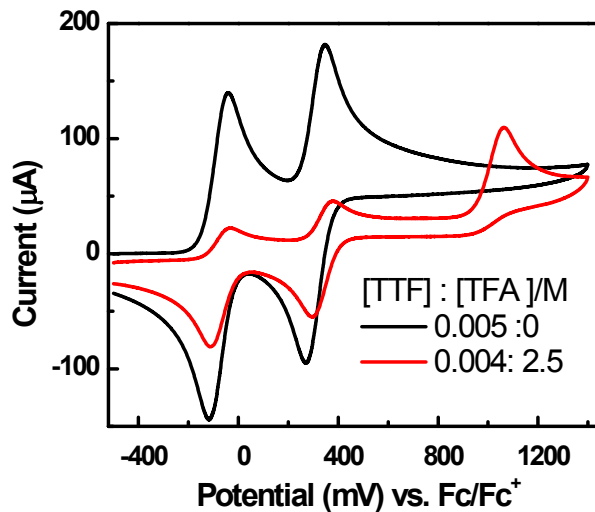

**Figure S5** Cyclic voltammograms of TTF obtained at scan rate  $100 \text{ mV s}^{-1}$  in acetonitrile (0.1 M  $\text{Bu}_4\text{NPF}_6$ ) for TTF in with a 3 mm GC electrode at designated TTF and TFA concentrations.

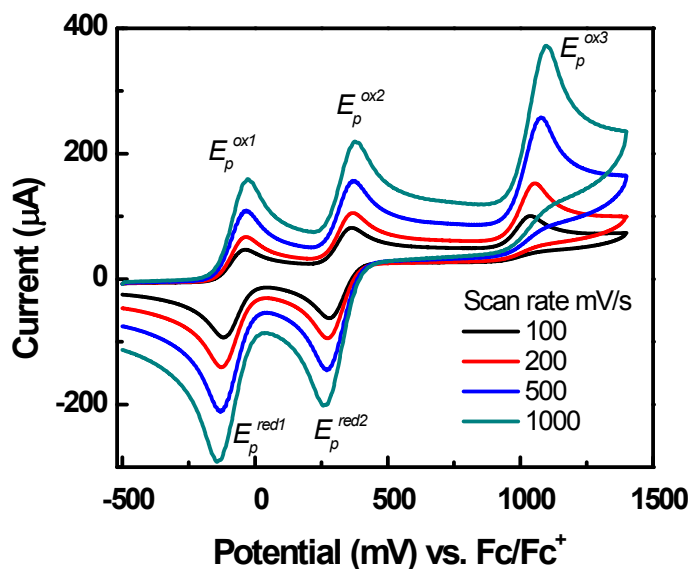

**Figure S6** Cyclic voltammograms for 4.35 mM TTF in the presence of 1.5 M TFA obtained at a scan rate of  $100 \text{ mV s}^{-1}$  in acetonitrile (0.1 M  $\text{Bu}_4\text{NPF}_6$ ) with a 3 mm diameter GC electrode.

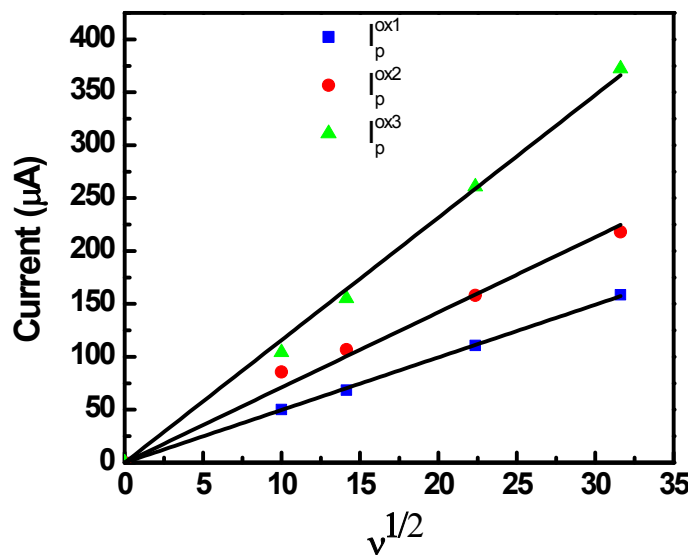

**Figure S7** Dependence of peak currents, for the first ( $I_p^{ox1}$ ), second ( $I_p^{ox2}$ ) and third ( $I_p^{ox3}$ ) consecutive processes versus the square root of scan rate for 4.35 mM TTF in the presence of 1.5 M TFA in acetonitrile (0.1 M  $Bu_4NPF_6$ ).

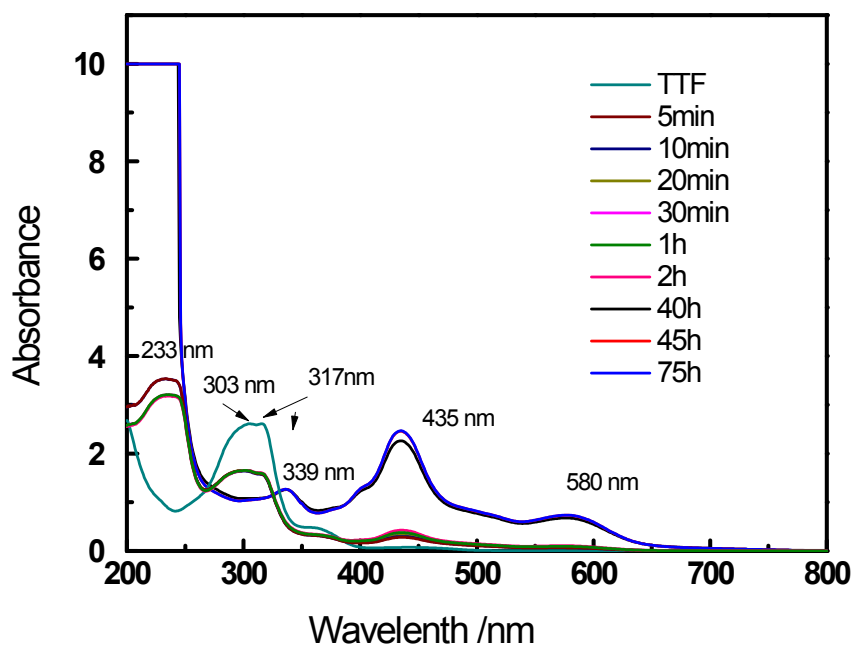

**Figure S8** UV-vis spectra of obtained as a function of time after addition of 500 mM TFA to 0.25 mM TTF in  $CH_3CN$  (0.1 M  $Bu_4NPF_6$ ).
